# Supplementary material
Source: Springer Nature journal article supplement (https://www.springermedizin.de/resource/supplementary/13195_2014_211_MOESM1_ESM.pdf/9688484)

**A**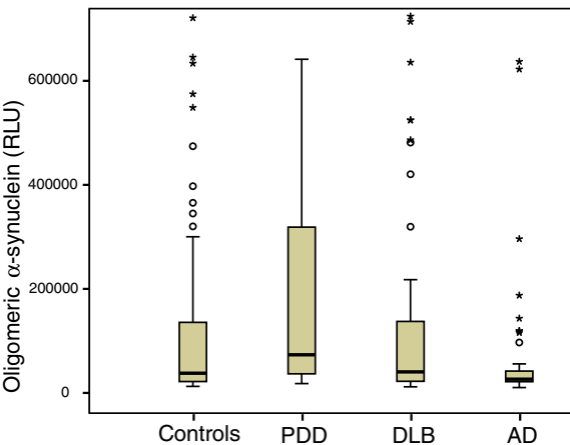**B**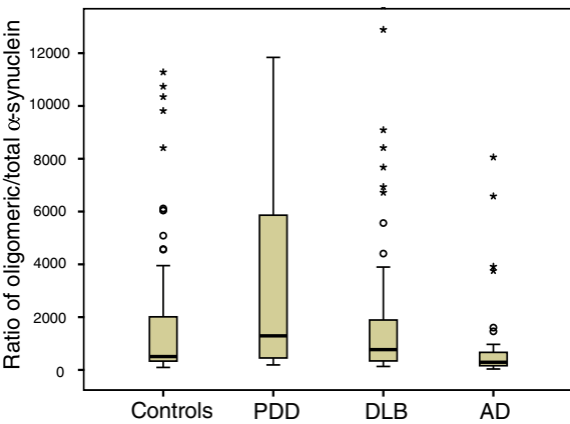

Supplement: MOESM1 [file 9688484]
